# Supplementary material for: Correlation between Antioxidant Activity and the Garcinol Content Released from Fruit Rinds of Endemic Garcinia quaesita Pierre on Different Cooking Conditions
Source: Hindawi journal article supplement (doi:10.1155/2020/7389714), 2020-02-28
Supplement: f1 [file 7389714.f1.pdf]

## Correlation between antioxidant activity and the garcinol content released from fruit rinds of endemic *Garcinia quaesita* Pierre on different cooking conditions

Donisha Shani Niharika Keembiya Liyanagamage,<sup>1,2</sup> Susanthi Jayasinghe,<sup>1\*</sup>Anoja Priyadarshani Attanayake,<sup>3</sup> Veranja Karunaratne<sup>1</sup>

### Supplementary file 1

The yellow crystalline compound isolated from hexane extract was identified as garcinol by UV, <sup>1</sup>H NMR, <sup>13</sup>C NMR, and LC-MS spectral data and by comparison with the literature data, mp 126 °C, UV in EtOH (log ε) 256 nm, 327 nm; IR 3200–3500, 1730, 1640 cm<sup>-1</sup>; LC-MS was *m/z* 602 and [α]<sup>27</sup> = -140<sup>0</sup>.

(Figure 1: <sup>1</sup>H NMR Spectrum for Garcinol, Figure 1: <sup>13</sup>C NMR Spectrum for Garcinol, Figure 3; IR Spectrum for Garcinol)

The identification of compound was substantiated by the presence of some characteristic proton and carbon signals on the <sup>1</sup>H NMR and <sup>13</sup>C NMR Spectra (Table 1). All the data above along with the UV, NMR, IR and melting point agreed with reported garcinol characterization.

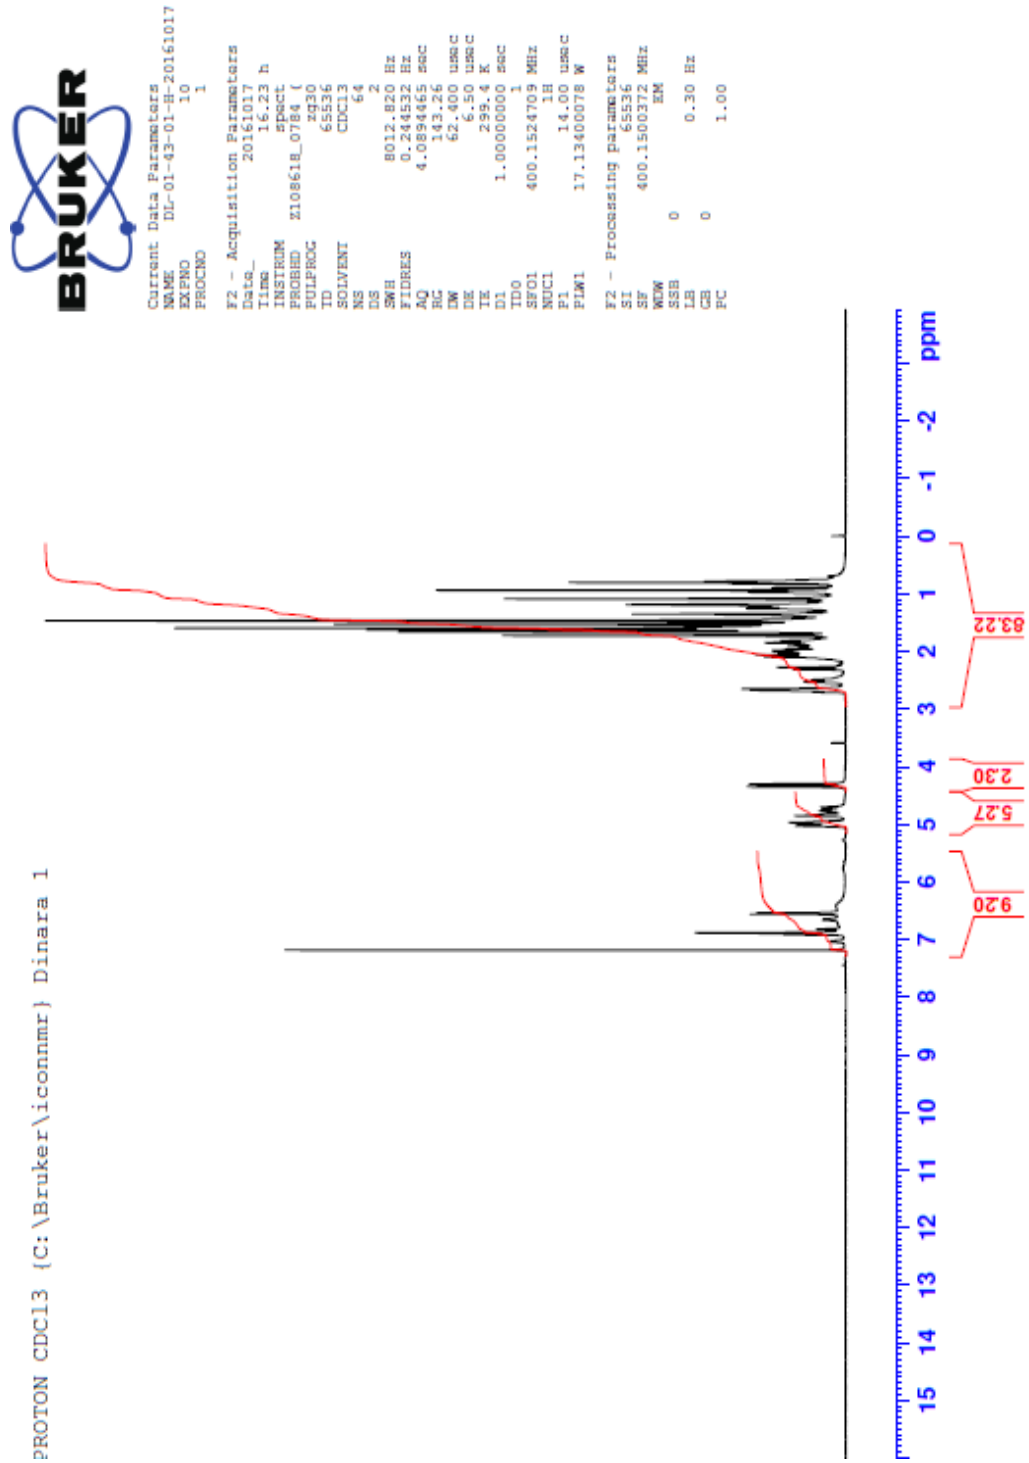

Figure 1: <sup>1</sup>H NMR Spectrum for Garcinol

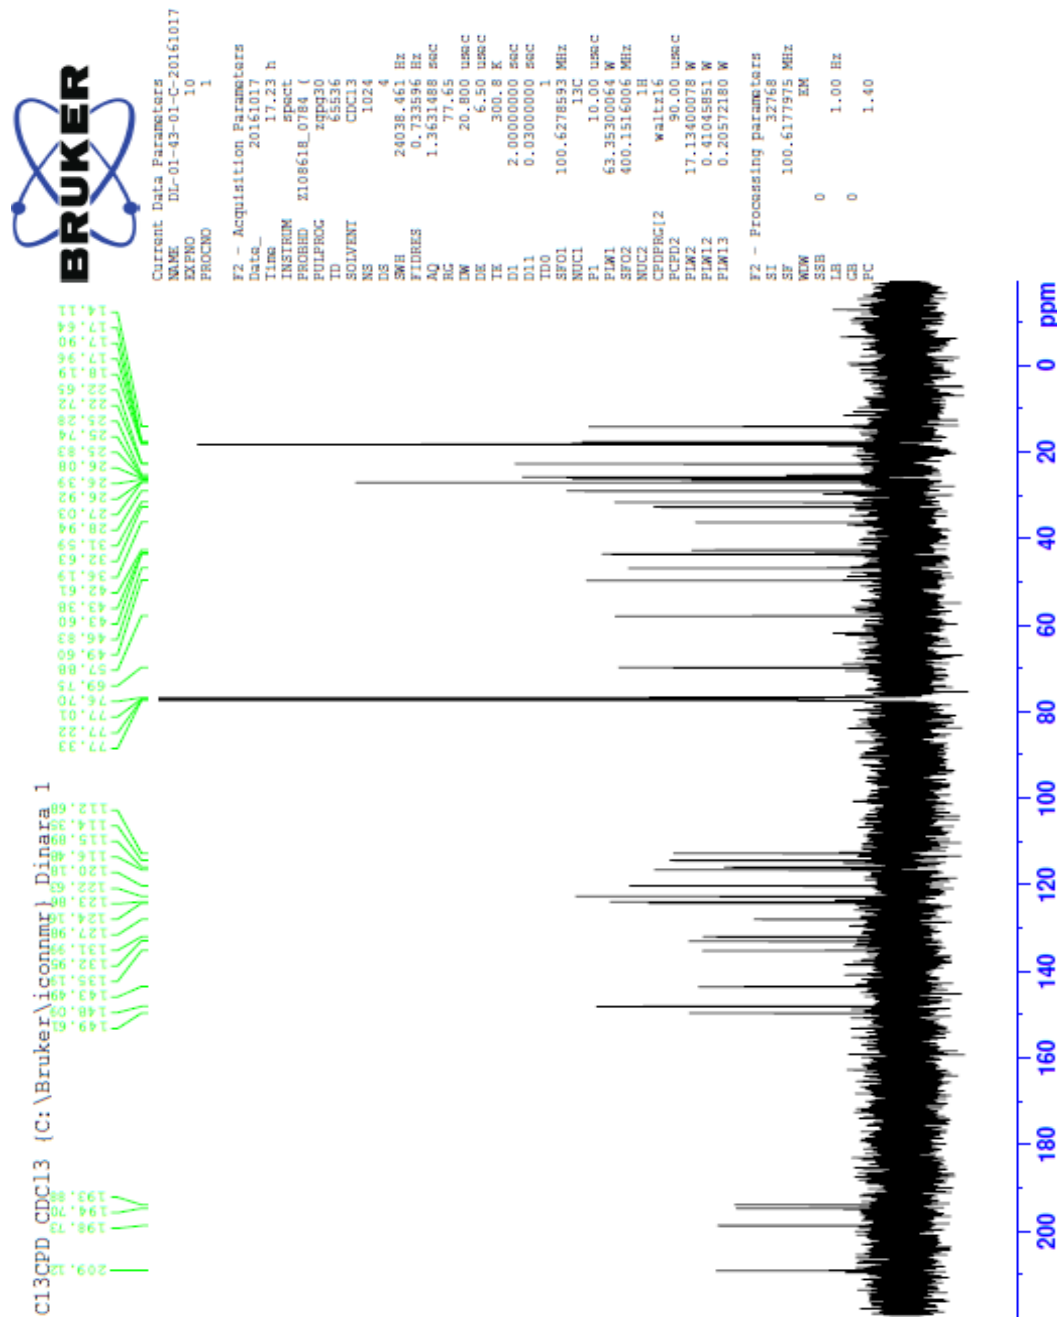

Figure: <sup>13</sup>C NMR Spectrum for Garcinol

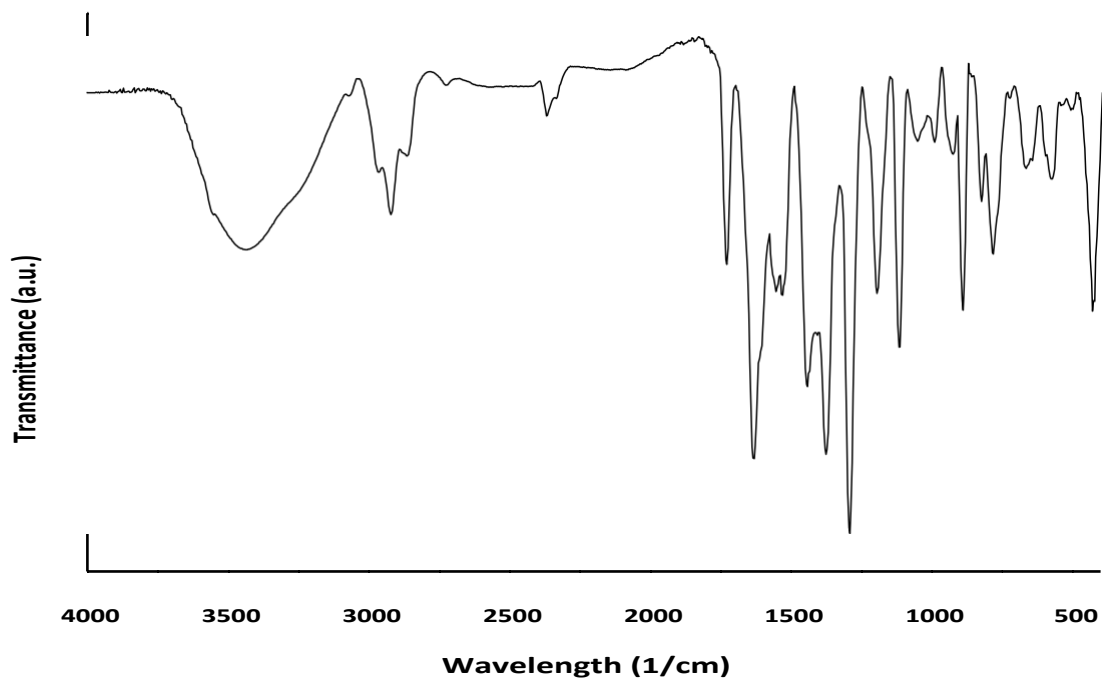

Figure 3: IR Spectrum for Garcinol

Table 1: <sup>1</sup>H and <sup>13</sup>C NMR data of garcinol in Chloroform (δ in ppm)

| Position | <sup>1</sup> H Garcinol | <sup>13</sup> C Garcinol |
|----------|-------------------------|--------------------------|
| 1        | -                       | 69.5                     |
| 2        | -                       | 192.0                    |
| 3        | -                       | 117.9                    |
| 4        | 16.77 s                 | 196.1                    |
| 5        | -                       | 59.7                     |
| 6        | 1.84, 1.82 d            | 43.8                     |
| 7        | 1.81 s                  | 48.3                     |
| 8        | 0.99, 0.99 d            | 48.5                     |
| 9        | -                       | 209.9                    |
| 10       | 2.40, 2.15 d            | 26.5                     |
| 11       | 5.20 t                  | 120.8                    |
| 12       | -                       | 134.8                    |
| 13       | 1.82 s                  | 18.6                     |
| 14       | 1.70 s                  | 24.6                     |
| 15       | -                       | 194.9                    |
| 16       | -                       | 130.3                    |
| 17       | 7.23 s                  | 117.0                    |
| 18       | 5.35 d                  | 146.5                    |
| 19       | 5.35 d                  | 158.1                    |
| 20       | 7.17 d                  | 117.8                    |
| 21       | 7.61 d                  | 123.9                    |
| 22       | 1.53 d                  | 37.3                     |
| 23       | 2.20 m                  | 45.2                     |
| 24       | 2.08, 1.83 t            | 33.5                     |
| 25       | 5.20 t                  | 125.1                    |
| 26       | -                       | 131.3                    |
| 27       | 1.70 s                  | 18.61                    |
| 28       | -                       | 147.7                    |
| 29       | 5.11, 4.92 s            | 110.6                    |
| 30       | 1.82 t                  | 21.5                     |
| 31       | 1.82 d                  | 24.6                     |
| 32       | 2.04, 1.79 d            | 29.0                     |
| 33       | 5.20 t                  | 123.5                    |
| 34       | -                       | 131.3                    |
| 35       | 1.82 d                  | 18.6                     |
| 36       | 1.70 d                  | 24.6                     |

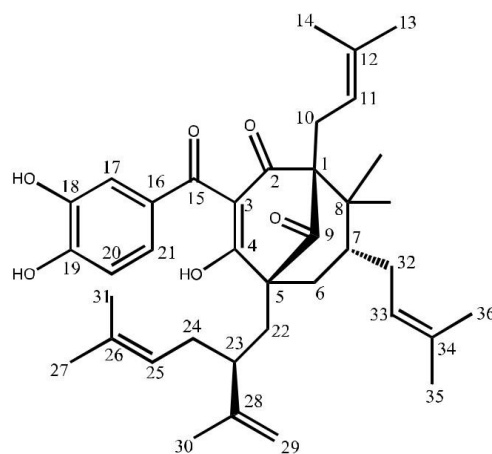

Figure 4: Structure of garcinol
